# Supplementary material for: Genus-wide comparison of Pseudovibrio bacterial genomes reveal diverse adaptations to different marine invertebrate hosts
Source: PLoS One. 2018 May 18;13(5):e0194368. doi: 10.1371/journal.pone.0194368 (PMC5959193; doi:10.1371/journal.pone.0194368)
Supplement: S2 Table — (XLSX) [file pone.0194368.s010.xlsx]

## Sheet: Sheet1
Table S2. Prorportion of COG categories detected in the core and flexible (shell and cloud) genomes
COG catgories	Core genes	Shell genes	Cloud genes
B	0.000	0.000	0.001
C	0.010	0.011	0.023
D	0.002	0.001	0.004
E	0.019	0.025	0.040
F	0.005	0.004	0.007
G	0.008	0.022	0.033
H	0.010	0.008	0.014
I	0.008	0.012	0.017
J	0.014	0.005	0.011
K	0.011	0.032	0.037
L	0.007	0.007	0.035
M	0.008	0.012	0.024
N	0.006	0.002	0.005
O	0.009	0.006	0.011
P	0.009	0.012	0.020
Q	0.003	0.014	0.022
R	0.020	0.041	0.059
S	0.015	0.029	0.035
T	0.009	0.010	0.014
U	0.005	0.003	0.006
V	0.002	0.004	0.010
W	0.000	0.000	0.000
Z	0.000	0.000	0.000
Comparison of proportions of COG categories between the flexible (shell and cloud) and core genomes
	Cloud vs Core genes			Shell vs Core genes
COG catgories	Z-value	P-value		Z-value	P-value
B	2.93382	0.00335702	***	0	0
C	6.69305	2.32241e-11	***	0.643439	0.519956
D	2.39846	0.0164855	**	-1.69469	0.0901704	*
E	8.13993	4.50766e-16	***	2.68275	0.00731588	***
F	1.69852	0.0894455	*	-0.979903	0.327162
G	11.571	9.75565e-31	***	7.55395	4.65485e-14	***
H	2.40936	0.0160016	**	7.55395	4.65485e-14	***
I	5.31287	1.10615e-07	***	2.63665	0.00838798	***
J	-1.77096	0.0766035	*	-6.08504	1.2144e-09	***
K	11.1417	1.23321e-28	***	9.49576	2.77873e-21	***
L	12.8076	3.2492e-37	***	0	1
M	8.3632	7.05957e-17	***	2.63665	0.00838798	***
N	-0.886801	0.375211		-4.15633	3.26531e-05	***
O	1.31832	0.18743		-2.28053	0.0226008	**
P	6.03518	1.65353e-09	***	1.93032	0.0536004	*
Q	11.2161	5.40249e-29	***	7.85863	4.35198e-15	***
R	13.1319	5.12303e-39	***	8.0095	1.30212e-15	***
S	8.40171	5.10261e-17	***	6.25975	4.04036e-10	***
T	3.07569	0.00210674	***	3.07569	0.00210674	***
U	0.886801	0.375211		-2.07817	0.0377236	**
V	6.79409	1.16246e-11	***	2.39846	0.0164855	**
W	0	0		0	0
Z	0	0		0	0
*** p<0.01, ** p<0.05, * p<0.1
