# Supplementary material for: Genus-wide comparison of Pseudovibrio bacterial genomes reveal diverse adaptations to different marine invertebrate hosts
Source: PLoS One. 2018 May 18;13(5):e0194368. doi: 10.1371/journal.pone.0194368 (PMC5959193; doi:10.1371/journal.pone.0194368)
Supplement: S3 Table — (XLSX) [file pone.0194368.s011.xlsx]

## Sheet: FO-BEG1
Table S3. List of predicted eukarytic-like proteins (ELPs) in the genomes of the genus Pseudovibrio.
Organism: Pseudovibrio sp. FO-BEG1
Tetratricopeptide repeats-containing proteins
Locus tag	Gene	Product
FOBEG_04704		lipoprotein NlpI
FOBEG_03984		cellulose synthase subunit BcsC
FOBEG_03148		Tetratricopeptide repeat protein
FOBEG_02685	yrrB	TPR repeat-containing protein YrrB
FOBEG_01077		lipoprotein NlpI
FOBEG_01678		Tetratricopeptide repeat protein
FOBEG_04731		Tetratricopeptide repeat protein
FOBEG_03682		Tetratricopeptide repeat protein
FOBEG_03686		Tetratricopeptide repeat protein
FOBEG_02468	ccmH	Cytochrome c-type biogenesis protein CcmH
FOBEG_04641		tol-pal system protein YbgF
FOBEG_03459		Tetratricopeptide repeat protein
FOBEG_00097	trxA	Thioredoxin-1
FOBEG_04845		putative protoheme IX biogenesis protein
FOBEG_00840		Hypothetical protein
FOBEG_04244	bamD	Outer membrane protein assembly factor BamD
FOBEG_04062		Tetratricopeptide repeat protein
FOBEG_02693		Hypothetical protein
FOBEG_00891		GSCFA family protein
FOBEG_00861		bifunctional 3-demethylubiquinone-9 3-methyltransferase/ 2-octaprenyl-6-hydroxy phenol methylase
FOBEG_03599	slt	Soluble lytic murein transglycosylase
FOBEG_02309		bifunctional 3-demethylubiquinone-9 3-methyltransferase/ 2-octaprenyl-6-hydroxy phenol methylase
Sel1 domain containing proteins
FOBEG_00263	hcpC	Putative beta-lactamase HcpC
FOBEG_01727	podJ	Localization factor PodJL
FOBEG_02538	hcpC	Putative beta-lactamase HcpC
FOBEG_04201	hcpC	Putative beta-lactamase HcpC
FOBEG_04666	hcpC	Putative beta-lactamase HcpC
FOBEG_04199	hcpC	Putative beta-lactamase HcpC
FOBEG_02992		Sel1 repeat protein
FOBEG_01784		Sel1 repeat protein
Ankyrin repeats-containing proteins
FOBEG_00540		Ankyrin repeats (3 copies)
FOBEG_00776		Ankyrin repeats (3 copies)
FOBEG_02068		Ankyrin repeats (3 copies)
FOBEG_03100		Ankyrin repeats (3 copies)
Fibronectin type III domain-containing protein
FOBEG_01606		Thermostable beta-glucosidase B
Leucine-rich repeats-containing proteins
FOBEG_01505	inlA	Internalin-A
FOBEG_03525	inlA	Internalin-A
Laminin G domain-containing proteins
Not detected
Immunoglobulin-like domain-containing proteins
Not detected
YadA domain-containing proteins
FOBEG_02088		YadA-like C-terminal region
FOBEG_02100		YadA-like C-terminal region
TadE-like domain-conatining proteins
FOBEG_01082		TadE-like protein
FOBEG_01083		TadE-like protein
Invasion-associated locus B
FOBEG_01541	ialB	Invasion associated locus B (IalB) protein
FOBEG_01991	ialB	Invasion associated locus B (IalB) protein
FOBEG_02087	ialB	Invasion associated locus B (IalB) protein
FOBEG_02099	ialB	Invasion associated locus B (IalB) protein
FOBEG_03178	ialB	Invasion associated locus B (IalB) protein

## Sheet: JE062
Organism: Pseudovibrio sp. JE062
Tetratricopeptide repeats-containing proteins
Locus tag	Gene	Product
JE_062_01297		lipoprotein NlpI
JE_062_04186		cellulose synthase subunit BcsC
JE_062_04931		Tetratricopeptide repeat protein
JE_062_00895	yrrB	TPR repeat-containing protein YrrB
JE_062_00549		lipoprotein NlpI
JE_062_02543		Tetratricopeptide repeat protein
JE_062_01269		Tetratricopeptide repeat protein
JE_062_04418		Tetratricopeptide repeat protein
JE_062_04414		Tetratricopeptide repeat protein
JE_062_01362		tol-pal system protein YbgF
JE_062_02293		formate-dependent nitrite reductase complex subunit NrfG
JE_062_02130	trxA	Thioredoxin-1
JE_062_01152		putative protoheme IX biogenesis protein
JE_062_04641	bepA	Beta-barrel assembly-enhancing protease
JE_062_03587		Hypothetical protein
JE_062_03963	bamD	Outer membrane protein assembly factor BamD
JE_062_04107		Tetratricopeptide repeat protein
JE_062_00887		Hypothetical protein
JE_062_03608		bifunctional 3-demethylubiquinone-9 3-methyltransferase/ 2-octaprenyl-6-hydroxy phenol methylase
JE_062_04503	slt	Soluble lytic murein transglycosylase
Sel1 domain containing proteins
JE_062_01047	hcpC	Putative beta-lactamase HcpC
JE_062_01335	hcpC	Putative beta-lactamase HcpC
JE_062_01972	hcpC	Putative beta-lactamase HcpC
JE_062_01973	hcpC	Putative beta-lactamase HcpC
JE_062_02493	podJ	Localization factor PodJL
JE_062_04005	hcpC	Putative beta-lactamase HcpC
JE_062_04007	hcpC	Putative beta-lactamase HcpC
JE_062_05013		Sel1 repeat protein
JE_062_02438		Hypothetical protein
Ankyrin repeats-containing proteins
JE_062_03288		Ankyrin repeats (3 copies)
Fibronectin type III domain-containing protein
JE_062_02617		Thermostable beta-glucosidase B
Leucine-rich repeats-containing proteins
JE_062_04576	slrP	E3 ubiquitin-protein ligase SlrP
Laminin G domain-containing proteins
Not detected
Immunoglobulin-like domain-containing proteins
Not detected
YadA domain-containing proteins
JE_062_02982		YadA-like C-terminal region
JE_062_02994		YadA-like C-terminal region
TadE-like domain-conatining proteins
JE_062_00554		TadE-like protein
JE_062_00555		TadE-like protein
Invasion-associated locus B
JE_062_02682	ialB	Invasion associated locus B (IalB) protein
JE_062_02892	ialB	Invasion associated locus B (IalB) protein
JE_062_02981	ialB	Invasion associated locus B (IalB) protein
JE_062_02993	ialB	Invasion associated locus B (IalB) protein
JE_062_04900	ialB	Invasion associated locus B (IalB) protein

## Sheet: POLY-S9
Organism: Pseudovibrio sp. POLY-S9
Tetratricopeptide repeats-containing proteins
Locus tag	Gene	Product
PPL9_01444		Tetratricopeptide repeat protein
PPL9_02009		Tetratricopeptide repeat protein
PPL9_00252		Tetratricopeptide repeat protein
PPL9_03828		Tetratricopeptide repeat protein
PPL9_04652		Tetratricopeptide repeat protein
PPL9_01188		Tetratricopeptide repeat protein
PPL9_03302		Tetratricopeptide repeat protein
PPL9_03298		Tetratricopeptide repeat protein
PPL9_05604		Outer membrane assembly lipoprotein YfiO
PPL9_01378		Tol-Pal system YbgF (TPR domain)
PPL9_05798	cycH	Cytochrome c-type biogenesis protein cycH (TPR domain)
PPL9_01302		HemY domain protein (TPR domain)
PPL9_03127		Thioredoxin
PPL9_01066		Hypothetical protein
PPL9_04171		Peptidase family M48
PPL9_02094		tetratricopeptide TPR_4 protein
PPL9_04792		Hypothetical protein
PPL9_03661		Hypothetical protein
PPL9_05512		GSCFA domain protein
PPL9_01087		Methyltransferase type 12 (TPR domain)
PPL9_00262		Hypothetical protein
PPL9_03952		soluble lytic murein transglycosylase
PPL9_02162		Methyltransferase type 12
PPL9_00750		Methyltransferase type 12
Sel1 domain containing proteins
PPL9_04326		Sel1 domain protein repeat-containing protein
PPL9_04703		Sel1 domain protein repeat-containing protein
PPL9_05645		Sel1 domain protein repeat-containing protein
PPL9_04936		Sel1 domain protein repeat-containing protein
Ankyrin repeats-containing proteins
PPL9_00197		Ankyrin repeats
PPL9_00832		Ankyrin repeats
PPL9_02577		Ankyrin repeat protein
PPL9_04256		Ankyrin repeat protein
Fibronectin type III domain-containing protein
Not detected
Leucine-rich repeats-containing proteins
Not detected
Laminin G domain-containing proteins
Not detected
Immunoglobulin-like domain-containing proteins
Not detected
YadA domain-containing proteins
PPL9_01513		protein containing YadA-like, C-terminal domain
PPL9_01525		protein containing YadA-like, C-terminal domain
TadE-like domain-conatining proteins
PPL9_03823		TadE-like protein
PPL9_03824		TadE-like protein
Invasion-associated locus B
PPL9_00009	ialB	Invasion associated locus B
PPL9_00099	ialB	Invasion associated locus B
PPL9_01312	ialB	Invasion associated locus B
PPL9_01514	ialB	Invasion associated locus B
PPL9_01526	ialB	Invasion associated locus B
PPL9_01698	ialB	Invasion associated locus B
PPL9_01894		Invasion associated locus B (IalB) protein
PPL9_03477	ialB	Invasion associated locus B
PPL9_06248	ialB	Invasion associated locus B

## Sheet: AD2
Organism: Pseudovibrio axinellae AD2
Tetratricopeptide repeats-containing proteins
Locus tag	Gene	Product
AD2_04012		lipoprotein NlpI
AD2_03413		cellulose synthase subunit BcsC
AD2_02141	yrrB	TPR repeat-containing protein YrrB
AD2_02659		tetratricopeptide repeat protein
AD2_02954		Tetratricopeptide repeat protein
AD2_00927		lipoprotein NlpI
AD2_01455		Tetratricopeptide repeat protein
AD2_02941		Sulfotransferase domain protein
AD2_04033		Tetratricopeptide repeat protein
AD2_04513		Doubled CXXCH motif (Paired_CXXCH_1)
AD2_03622	bamD	Outer membrane protein assembly factor BamD
AD2_00706		Hypothetical protein
AD2_03954		tol-pal system protein YbgF
AD2_03756		GSCFA family protein
AD2_04136		putative protoheme IX biogenesis protein
AD2_00091	trxA	Thioredoxin-1
AD2_01930	ccmH	Cytochrome c-type biogenesis protein CcmH
AD2_02875	bepA	Beta-barrel assembly-enhancing protease
AD2_00728		bifunctional 3-demethylubiquinone-9 3-methyltransferase/ 2-octaprenyl-6-hydroxy phenol methylase
AD2_03144		GSCFA family protein
AD2_03483		Hypothetical protein
AD2_03010	slt	Soluble lytic murein transglycosylase
AD2_02148		Hypothetical protein
AD2_03052		GSCFA family protein
Sel1 domain-containing proteins
AD2_00228	hcpC	Putative beta-lactamase HcpC
AD2_01302	hcpC	Putative beta-lactamase HcpC
AD2_01498	podJ	Localization factor PodJL
AD2_03579	hcpD	Putative beta-lactamase HcpD
AD2_03976	hcpC	Putative beta-lactamase HcpC
AD2_02676		Sel1 repeat protein
AD2_01035		Hypothetical protein
Ankyrin repeats-containing proteins
AD2_02489		Ankyrin repeats (3 copies)
AD2_02490		Ankyrin repeats (3 copies)
Fibronectin type III domain-containing protein
AD2_01388		Thermostable beta-glucosidase B
Leucine-rich repeats-containing proteins
AD2_02936	slrP	E3 ubiquitin-protein ligase SlrP
Laminin G domain-containing proteins
AD2_04637		Hypothetical protein
Immunoglobulin-like domain-containing proteins
Not detected
YadA domain-containing proteins
Not detected
TadE-like domain-conatining proteins
AD2_00932		TadE-like protein
AD2_00933		TadE-like protein
Invasion-associated locus B
AD2_01329	ialB	Invasion associated locus B (IalB) protein
AD2_02716	ialB	Invasion associated locus B (IalB) protein

## Sheet: AD13
Organism: Pseudovibrio sp. AD13
Tetratricopeptide repeats-containing proteins
Locus tag	Gene	Product
AD13_05262		lipoprotein NlpI
AD13_03364		Tetratricopeptide repeat protein
AD13_04336		lipoprotein NlpI
AD13_02870	yrrB	TPR repeat-containing protein YrrB
AD13_01175		photosystem I assembly protein Ycf3
AD13_01827		Tetratricopeptide repeat protein
AD13_05289		Tetratricopeptide repeat protein
AD13_03981		Tetratricopeptide repeat protein
AD13_03985		Tetratricopeptide repeat protein
AD13_04921	bamD	Outer membrane protein assembly factor BamD
AD13_01018		tol-pal system protein YbgF
AD13_02583		formate-dependent nitrite reductase complex subunit NrfG
AD13_05422		putative protoheme IX biogenesis protein
AD13_00096	trxA	Thioredoxin-1
AD13_00837		Hypothetical protein
AD13_03687	bepA	Beta-barrel assembly-enhancing protease
AD13_04416		Hypothetical protein
AD13_02878		Hypothetical protein
AD13_00858		bifunctional 3-demethylubiquinone-9 3-methyltransferase/ 2-octaprenyl-6-hydroxy phenol methylase
AD13_03887	slt	Soluble lytic murein transglycosylase
Sel1 domain containing proteins
AD13_00303	hcpC	Putative beta-lactamase HcpC
AD13_01044	hcpC	Putative beta-lactamase HcpC
AD13_01662	hcpC	Putative beta-lactamase HcpC
AD13_01876	podJ	Localization factor PodJL
AD13_02116	hcpD	Putative beta-lactamase HcpD
AD13_02856	hcpC	Putative beta-lactamase HcpC
AD13_04882	hcpC	Putative beta-lactamase HcpC
AD13_05502	hcpC	Putative beta-lactamase HcpC
AD13_04880	hcpC	Putative beta-lactamase HcpC
AD13_03193		Sel1 repeat protein
Ankyrin repeats-containing proteins
AD13_00557		Ankyrin repeats (3 copies)
Fibronectin type III domain-containing protein
AD13_01754		Thermostable beta-glucosidase B
Leucine-rich repeats-containing proteins
AD13_03815	slrP	E3 ubiquitin-protein ligase SlrP
Laminin G domain-containing proteins
Not detected
Immunoglobulin-like domain-containing proteins
Not detected
YadA domain-containing proteins
AD13_02228		YadA-like C-terminal region
AD13_02240		YadA-like C-terminal region
TadE-like domain-conatining proteins
AD13_01180		TadE-like protein
AD13_01181		TadE-like protein
Invasion-associated locus B
AD13_01697	ialB	Invasion associated locus B (IalB) protein
AD13_02147	ialB	Invasion associated locus B (IalB) protein
AD13_02227	ialB	Invasion associated locus B (IalB) protein
AD13_02239	ialB	Invasion associated locus B (IalB) protein
AD13_03396	ialB	Invasion associated locus B (IalB) protein

## Sheet: AD14
Organism: Pseudovibrio sp. AD14
Tetratricopeptide repeats-containing proteins
Locus tag	Gene	Product
AD14_05261		lipoprotein NlpI
AD14_04571		lipoprotein NlpI
AD14_03513		Tetratricopeptide repeat protein
AD14_03072	yrrB	TPR repeat-containing protein YrrB
AD14_01021		lipoprotein NlpI
AD14_01573		Photosystem I assembly protein Ycf3
AD14_05289		Tetratricopeptide repeat protein
AD14_04286		Tetratricopeptide repeat protein
AD14_04290		Tetratricopeptide repeat protein
AD14_04827	bamD	Outer membrane protein assembly factor BamD
AD14_05198		tol-pal system protein YbgF
AD14_02771		formate-dependent nitrite reductase complex subunit NrfG
AD14_05401		putative protoheme IX biogenesis protein
AD14_00802		Hypothetical protein
AD14_00098	trxA	Thioredoxin-1
AD14_03933	bepA	Beta-barrel assembly-enhancing protease
AD14_04650		Hypothetical protein
AD14_00823		bifunctional 3-demethylubiquinone-9 3-methyltransferase/ 2-octaprenyl-6-hydroxy phenol methylase
AD14_03082		Hypothetical protein
AD14_00519		Hypothetical protein
AD14_04167	slt	Soluble lytic murein transglycosylase
Sel1 domain containing proteins
AD14_00258	hcpC	Putative beta-lactamase HcpC
AD14_01125	hcpD	Putative beta-lactamase HcpD
AD14_01622	podJ	Localization factor PodJL
AD14_04789	hcpC	Putative beta-lactamase HcpC
AD14_05224	hcpC	Putative beta-lactamase HcpC
AD14_03365		Sel1 repeat protein
Ankyrin repeats-containing proteins
AD14_00518		Ankyrin repeats (3 copies)
AD14_02617		Ankyrin repeats (3 copies)
AD14_03654		Ankyrin repeats (3 copies)
Leucine-rich repeats-containing proteins
AD14_04097	slrP	E3 ubiquitin-protein ligase SlrP
Laminin G domain-containing proteins
Not detected
Immunoglobulin-like domain-containing proteins
Not detected
YadA domain-containing proteins
AD14_02338		YadA-like C-terminal region
AD14_02350		YadA-like C-terminal region
TadE-like domain-conatining proteins
AD14_01026		TadE-like protein
AD14_01027		TadE-like protein
Invasion-associated locus B
AD14_01433	ialB	Invasion associated locus B (IalB) protein
AD14_01482	ialB	Invasion associated locus B (IalB) protein
AD14_02205	ialB	Invasion associated locus B (IalB) protein
AD14_02255	ialB	Invasion associated locus B (IalB) protein
AD14_02337	ialB	Invasion associated locus B (IalB) protein
AD14_02349	ialB	Invasion associated locus B (IalB) protein
AD14_03546	ialB	Invasion associated locus B (IalB) protein

## Sheet: AD26
Organism: Pseudovibrio sp. AD26
Tetratricopeptide repeats-containing proteins
Locus tag	Gene	Product
AD26_05071		lipoprotein NlpI
AD26_03493		Tetratricopeptide repeat protein
AD26_04287		lipoprotein NlpI
AD26_03032		lipoprotein NlpI
AD26_01025		lipoprotein NlpI
AD26_01599		Photosystem I assembly protein Ycf3
AD26_05100		Tetratricopeptide repeat protein
AD26_04098		Tetratricopeptide repeat protein
AD26_04102		Tetratricopeptide repeat protein
AD26_04575	bamD	Outer membrane protein assembly factor BamD
AD26_05005		tol-pal system protein YbgF
AD26_05215		putative protoheme IX biogenesis protein
AD26_02599	ccmH	Cytochrome c-type biogenesis protein CcmH
AD26_00763		Hypothetical protein
AD26_00096	trxA	Thioredoxin-1
AD26_03798	bepA	Beta-barrel assembly-enhancing protease
AD26_04365		Hypothetical protein
AD26_00784		bifunctional 3-demethylubiquinone-9 3-methyltransferase/ 2-octaprenyl-6-hydroxy phenol methylase
AD26_03042		Hypothetical protein
AD26_03991	slt	Soluble lytic murein transglycosylase
Sel1 domain containing proteins
AD26_01435	hcpC	Putative beta-lactamase HcpC
AD26_01646	podJ	Localization factor PodJL
AD26_02667	hcpC	Putative beta-lactamase HcpC
AD26_04534	hcpC	Putative beta-lactamase HcpC
AD26_05030	hcpC	Putative beta-lactamase HcpC
AD26_05754	hcpC	Putative beta-lactamase HcpC
AD26_03327		Sel1 repeat protein
Ankyrin repeats-containing proteins
AD26_00398		Ankyrin repeats (3 copies)
AD26_00476		Ankyrin repeats (3 copies)
AD26_05762		Ankyrin repeats (3 copies)
Fibronectin type III domain-containing protein
AD26_01527		Thermostable beta-glucosidase B
Leucine-rich repeats-containing proteins
AD26_03919	slrP	E3 ubiquitin-protein ligase SlrP
Laminin G domain-containing proteins
Not detected
Immunoglobulin-like domain-containing proteins
AD26_04478		Bacterial Ig-like domain (group 1)
YadA domain-containing proteins
AD26_02295		YadA-like C-terminal region
AD26_02307		YadA-like C-terminal region
TadE-like domain-conatining proteins
AD26_00274		TadE-like protein
AD26_00275		TadE-like protein
Invasion-associated locus B
AD26_01466	ialB	Invasion associated locus B (IalB) protein
AD26_02205	ialB	Invasion associated locus B (IalB) protein
AD26_02294	ialB	Invasion associated locus B (IalB) protein
AD26_02306	ialB	Invasion associated locus B (IalB) protein
AD26_03525	ialB	Invasion associated locus B (IalB) protein
AD26_05755	ialB	Invasion associated locus B (IalB) protein

## Sheet: AD37
Organism: Pseudovibrio sp. AD37
Tetratricopeptide repeats-containing proteins
Locus tag	Gene	Product
AD37_04372		ipoprotein NlpI
AD37_03709		lipoprotein NlpI
AD37_02858		Tetratricopeptide repeat protein
AD37_02499	yrrB	TPR repeat-containing protein YrrB
AD37_01042		lipoprotein NlpI
AD37_01633		Photosystem I assembly protein Ycf3
AD37_04400		Tetratricopeptide repeat protein
AD37_03440		Tetratricopeptide repeat protein
AD37_03444		Tetratricopeptide repeat protein
AD37_03955	bamD	Outer membrane protein assembly factor BamD
AD37_04304		tol-pal system protein YbgF
AD37_02281		formate-dependent nitrite reductase complex subunit NrfG
AD37_04525		putative protoheme IX biogenesis protein
AD37_00099	trxA	Thioredoxin-1
AD37_03207	bepA	Beta-barrel assembly-enhancing protease
AD37_00816		Hypothetical protein
AD37_03784		Hypothetical protein
AD37_02508		Tetratricopeptide repeat protein
AD37_00838		bifunctional 3-demethylubiquinone-9 3-methyltransferase/ 2-octaprenyl-6-hydroxy phenol methylase
AD37_01294		Hypothetical protein
Sel1 domain containing proteins
AD37_01467	hcpC	Putative beta-lactamase HcpC
AD37_01684	podJ	Localization factor PodJL
AD37_01910	hcpD	Putative beta-lactamase HcpD
AD37_03916	hcpC	Putative beta-lactamase HcpC
AD37_04332	hcpC	Putative beta-lactamase HcpC
AD37_05148	hcpD	Putative beta-lactamase HcpD
AD37_02766		Sel1 repeat protein
Ankyrin repeats-containing proteins
AD37_00433		Ankyrin repeats (3 copies)
Fibronectin type III domain-containing protein
AD37_01559		Thermostable beta-glucosidase B
Leucine-rich repeats-containing proteins
AD37_03143		Nucleoid occlusion protein
AD37_03283		E3 ubiquitin-protein ligase sspH2
Laminin G domain-containing proteins
Not detected
Immunoglobulin-like domain-containing proteins
AD37_04712		Bacterial Ig-like domain (group 1)
AD37_05378		Bacterial Ig-like domain (group 1)
YadA domain-containing proteins
AD37_02021		YadA-like C-terminal region
AD37_02033		YadA-like C-terminal region
TadE-like domain-conatining proteins
AD37_01047		TadE-like protein
AD37_01048		TadE-like protein
Invasion-associated locus B
AD37_01499	ialB	Invasion associated locus B (IalB) protein
AD37_01939	ialB	Invasion associated locus B (IalB) protein
AD37_02020	ialB	Invasion associated locus B (IalB) protein
AD37_02032	ialB	Invasion associated locus B (IalB) protein
AD37_02896	ialB	Invasion associated locus B (IalB) protein
AD37_03888	ialB	Invasion associated locus B (IalB) protein
AD37_05305	ialB	Invasion associated locus B (IalB) protein

## Sheet: AD46
Organism: Pseudovibrio sp. AD46
Tetratricopeptide repeats-containing proteins
Locus tag	Gene	Product
AD46_05079		lipoprotein NlpI
AD46_04402		lipoprotein NlpI
AD46_03405		Tetratricopeptide repeat protein
AD46_02584	yrrB	TPR repeat-containing protein YrrB
AD46_01051		photosystem I assembly protein Ycf3
AD46_01644		Photosystem I assembly protein Ycf3
AD46_05105		Tetratricopeptide repeat protein
AD46_04842	pknB	Serine/threonine-protein kinase PknB
AD46_04082		Tetratricopeptide repeat protein
AD46_04086		Tetratricopeptide repeat protein
AD46_04626	bamD	Outer membrane protein assembly factor BamD
AD46_05008		tol-pal system protein YbgF
AD46_02367		formate-dependent nitrite reductase complex subunit NrfG
AD46_05232		putative protoheme IX biogenesis protein
AD46_00096	trxA	Thioredoxin-1
AD46_00797		Hypothetical protein
AD46_03750	bepA	Beta-barrel assembly-enhancing protease
AD46_04479		Hypothetical protein
AD46_00818		bifunctional 3-demethylubiquinone-9 3-methyltransferase/ 2-octaprenyl-6-hydroxy phenol methylase
AD46_02593		Hypothetical protein
AD46_01297		Hypothetical protein
AD46_00513		Hypothetical protein
AD46_03982	slt	Soluble lytic murein transglycosylase
Sel1 domain containing proteins
AD46_00260	hcpC	Putative beta-lactamase HcpC
AD46_01158	hcpD	Putative beta-lactamase HcpD
AD46_01692	podJ	Localization factor PodJL
AD46_04587	hcpC	Putative beta-lactamase HcpC
AD46_05035	hcpC	Putative beta-lactamase HcpC
AD46_02889		Sel1 repeat protein
AD46_00503		Hypothetical protein
Ankyrin repeats-containing proteins
AD46_00512		Ankyrin repeats (3 copies)
Leucine-rich repeats-containing proteins
AD46_03863	slrP	E3 ubiquitin-protein ligase SlrP
Laminin G domain-containing proteins
Not detected
Immunoglobulin-like domain-containing proteins
Not detected
Fibronectin type III domain-containing protein
AD46_01571		Thermostable beta-glucosidase B
YadA domain-containing proteins
AD46_02009		YadA-like C-terminal region
AD46_02021		YadA-like C-terminal region
TadE-like domain-conatining proteins
AD46_01056		TadE-like protein
AD46_01057		TadE-like protein
Invasion-associated locus B
AD46_01223	ialB	Invasion associated locus B (IalB) protein
AD46_01510	ialB	Invasion associated locus B (IalB) protein
AD46_01928	ialB	Invasion associated locus B (IalB) protein
AD46_02008	ialB	Invasion associated locus B (IalB) protein
AD46_02020	ialB	Invasion associated locus B (IalB) protein
AD46_03437	ialB	Invasion associated locus B (IalB) protein

## Sheet: AD5
Organism: Pseudovibrio sp. AD5
Tetratricopeptide repeats-containing proteins
Locus tag	Gene	Product
AD5_04982		lipoprotein NlpI
AD5_04222		lipoprotein NlpI
AD5_03225		Tetratricopeptide repeat protein
AD5_02408	yrrB	TPR repeat-containing protein YrrB
AD5_00934		photosystem I assembly protein Ycf3
AD5_01514		Tetratricopeptide repeat protein
AD5_05009		Tetratricopeptide repeat protein
AD5_04750	pknB	Serine/threonine-protein kinase PknB
AD5_03929		Tetratricopeptide repeat protein
AD5_03933		Tetratricopeptide repeat protein
AD5_04538	bamD	Outer membrane protein assembly factor BamD
AD5_04916		tol-pal system protein YbgF
AD5_04450		Hypothetical protein
AD5_02191		formate-dependent nitrite reductase complex subunit NrfG
AD5_05127		putative protoheme IX biogenesis protein
AD5_00096	trxA	Thioredoxin-1
AD5_00803		Hypothetical protein
AD5_03562	bepA	Beta-barrel assembly-enhancing protease
AD5_04299		Hypothetical protein
AD5_00824		bifunctional 3-demethylubiquinone-9 3-methyltransferase/ 2-octaprenyl-6-hydroxy phenol methylase
AD5_02417		Hypothetical protein
AD5_01175		Hypothetical protein
AD5_00516		Hypothetical protein
AD5_03786	slt	Soluble lytic murein transglycosylase
Sel1 domain containing proteins
AD5_01040	hcpD	Putative beta-lactamase HcpD
AD5_01563	podJ	Localization factor PodJL
AD5_04499	hcpC	Putative beta-lactamase HcpC
AD5_04942	hcpC	Putative beta-lactamase HcpC
AD5_02716		Sel1 repeat protein
AD5_00506		Hypothetical protein
Ankyrin repeats-containing proteins
AD5_00515		Ankyrin repeats (3 copies)
Fibronectin type III domain-containing protein
AD5_01441		Thermostable beta-glucosidase B
Leucine-rich repeats-containing proteins
AD5_03668	slrP	E3 ubiquitin-protein ligase SlrP
Laminin G domain-containing proteins
Not detected
Immunoglobulin-like domain-containing proteins
Not detected
YadA domain-containing proteins
AD5_01875		YadA-like C-terminal region
AD5_01887		YadA-like C-terminal region
TadE-like domain-conatining proteins
AD5_00939		TadE-like protein
AD5_00940		TadE-like protein
Invasion-associated locus B
AD5_01384	ialB	Invasion associated locus B (IalB) protein
AD5_01794	ialB	Invasion associated locus B (IalB) protein
AD5_01874	ialB	Invasion associated locus B (IalB) protein
AD5_01886	ialB	Invasion associated locus B (IalB) protein
AD5_03257	ialB	Invasion associated locus B (IalB) protein

[truncated: 8 more sheets: W64, W74, WM33, DSM16392, Tun.PHSC04_5.I4, UST20140214-052, UST20140214-015B, JCM12308]
